# Supplementary material for: Synthesis of allyl alcohol as a method to valorise glycerol from the biodiesel production
Source: Royal Society of Chemistry journal article supplement (doi:10.1039/c9ra02338k), 2019-01-01
Supplement: c9ra02338k1.pdf [file c9ra02338k1.pdf]

# Synthesis of allyl alcohol as a method to valorise glycerol from the biodiesel production

Michael Wormann,<sup>a</sup> and Martin E. Maier <sup>\*a</sup>

<sup>a</sup> Eberhard Karls Universität Tübingen, Institut für Organische Chemie, Auf der Morgenstelle 18, 72976 Tübingen, Germany

## Table of Contents

|                   |    |
|-------------------|----|
| NMR-Spectra ..... | S2 |
|-------------------|----|

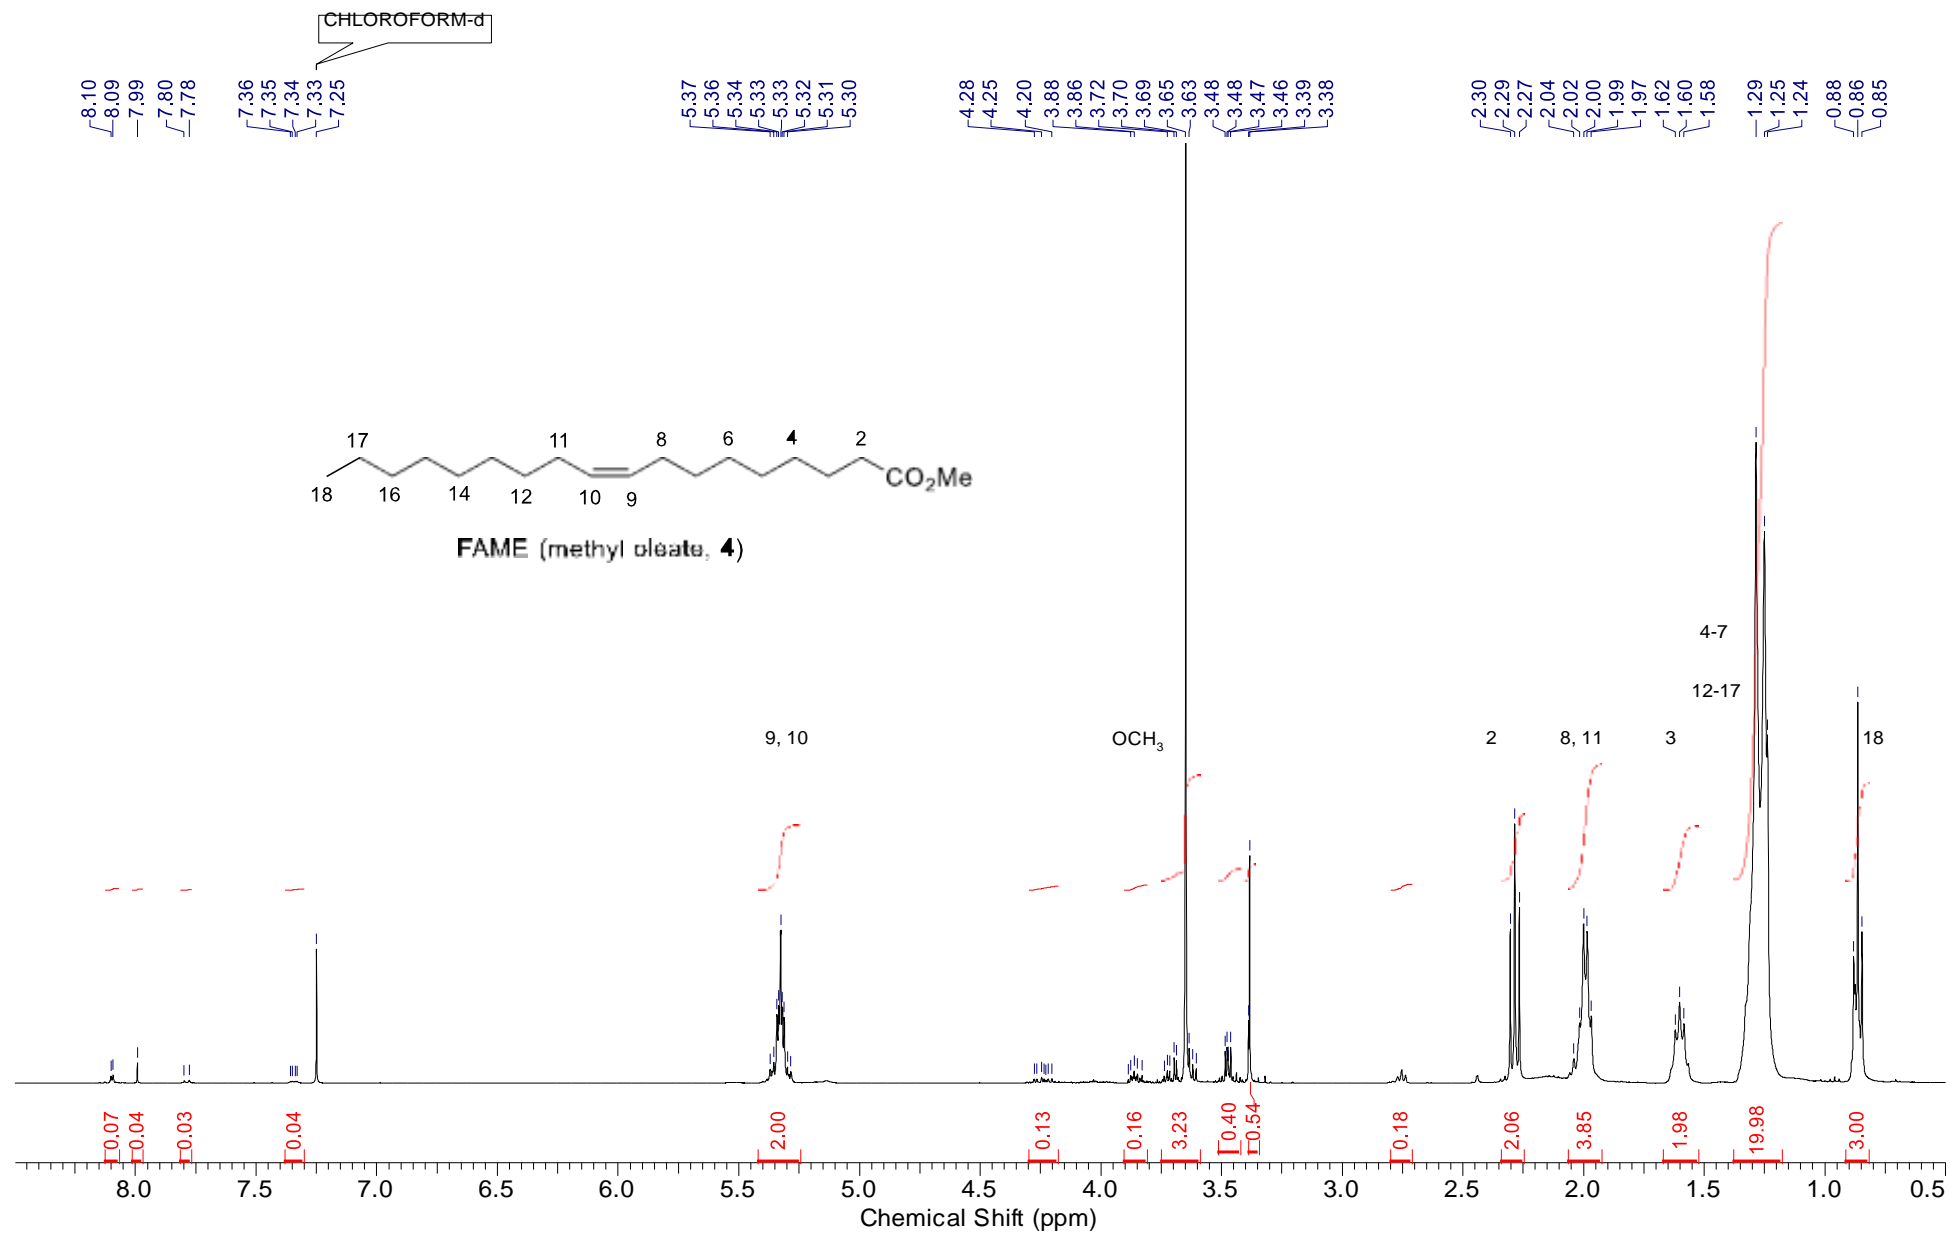

<sup>1</sup>H NMR (400 MHz) of FAME (**4**) in CDCl<sub>3</sub> (0.5 – 8.5 ppm)

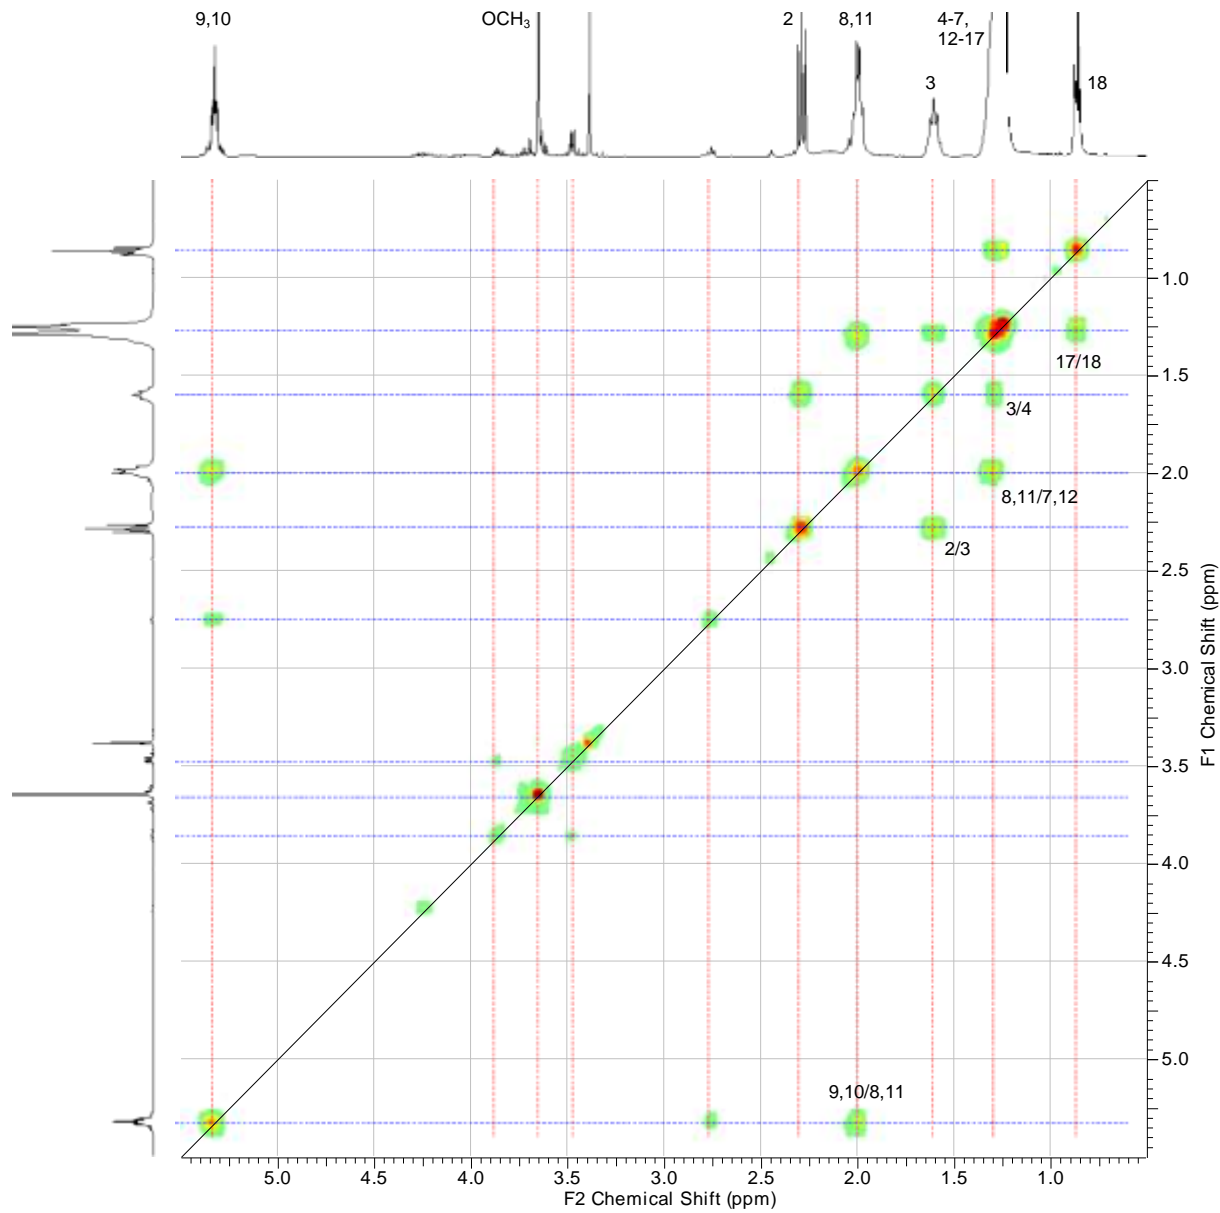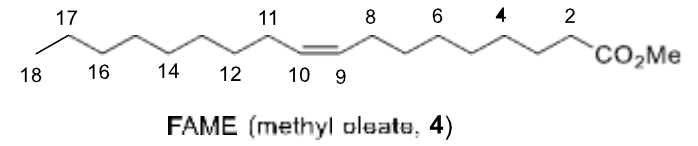

H-H COSY (400 MHz) spectrum of FAME (**4**) in CDCl<sub>3</sub> (0.5 – 5.5 ppm)

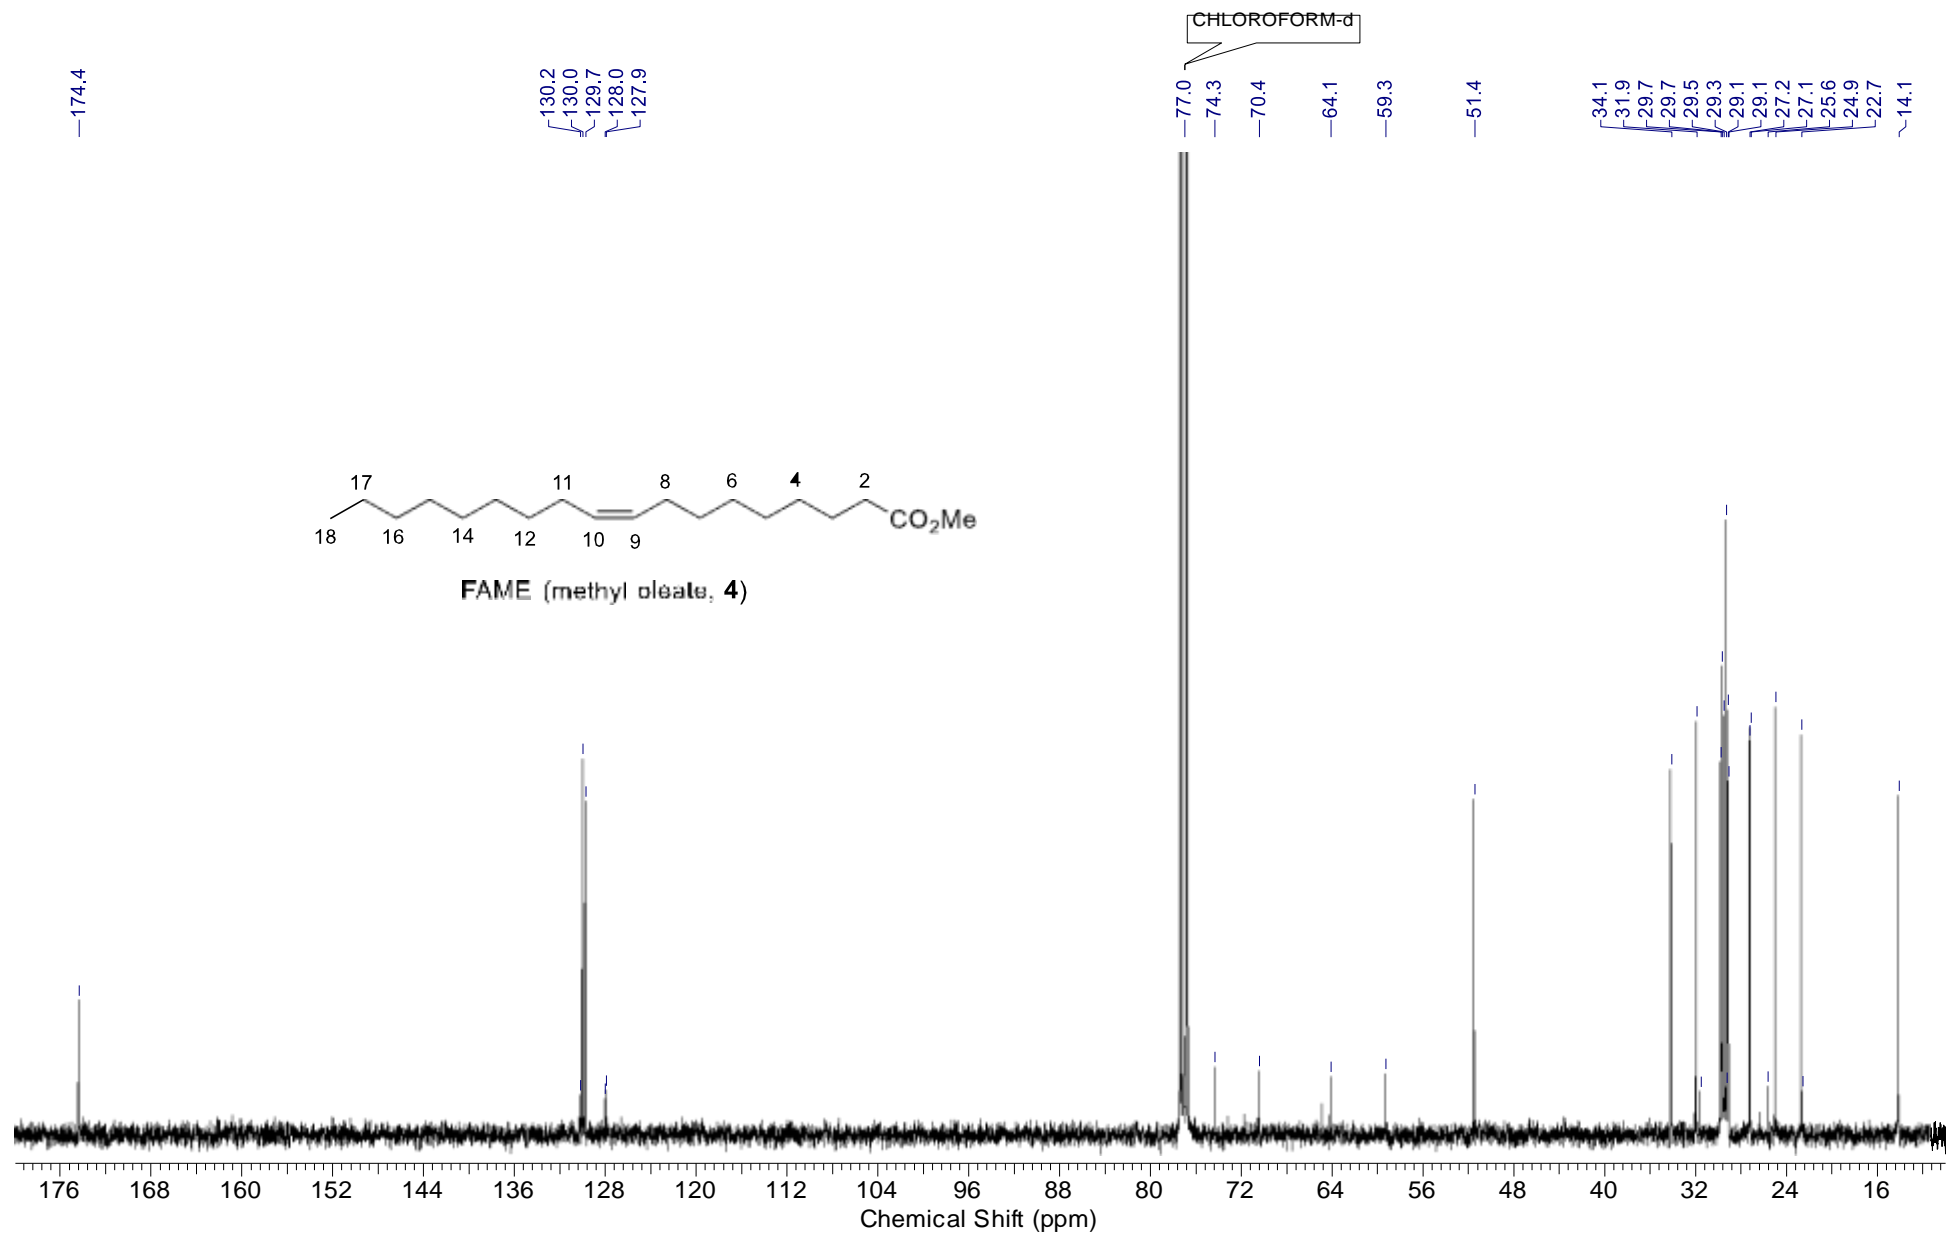

<sup>13</sup>C NMR (100 MHz) spectrum of FAME (4) in CDCl<sub>3</sub> (10 – 180 ppm)

—34.1

—31.9

—31.5

∫29.7  
—29.7  
—29.5  
—29.3  
29.1  
29.1  
29.1

∫27.2  
—27.1

—25.6

—24.9

—22.7  
~22.6

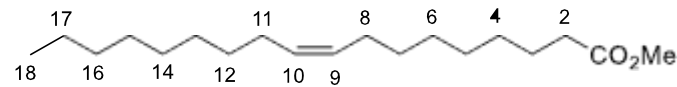

FAME (methyl oleate, 4)

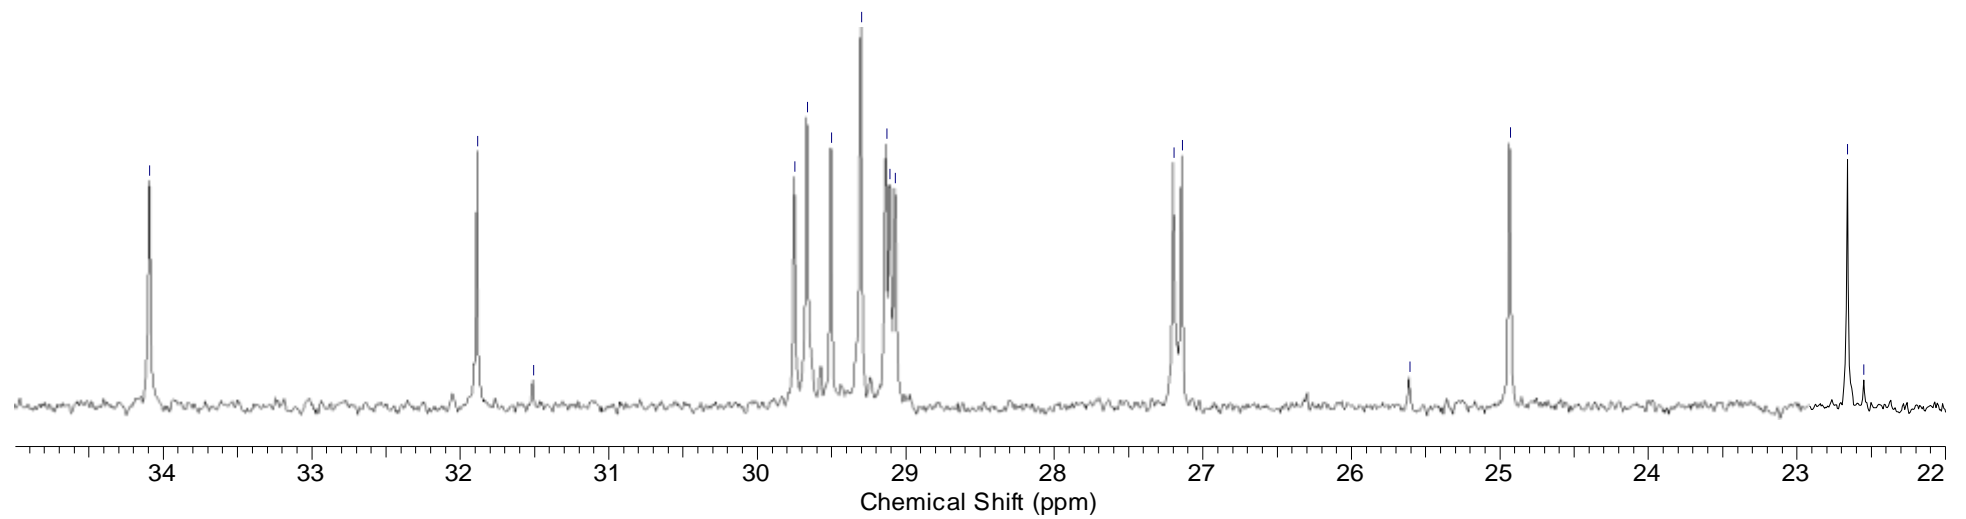

<sup>13</sup>C NMR (100 MHz) spectrum of FAME (4) in CDCl<sub>3</sub> (22 – 35 ppm)

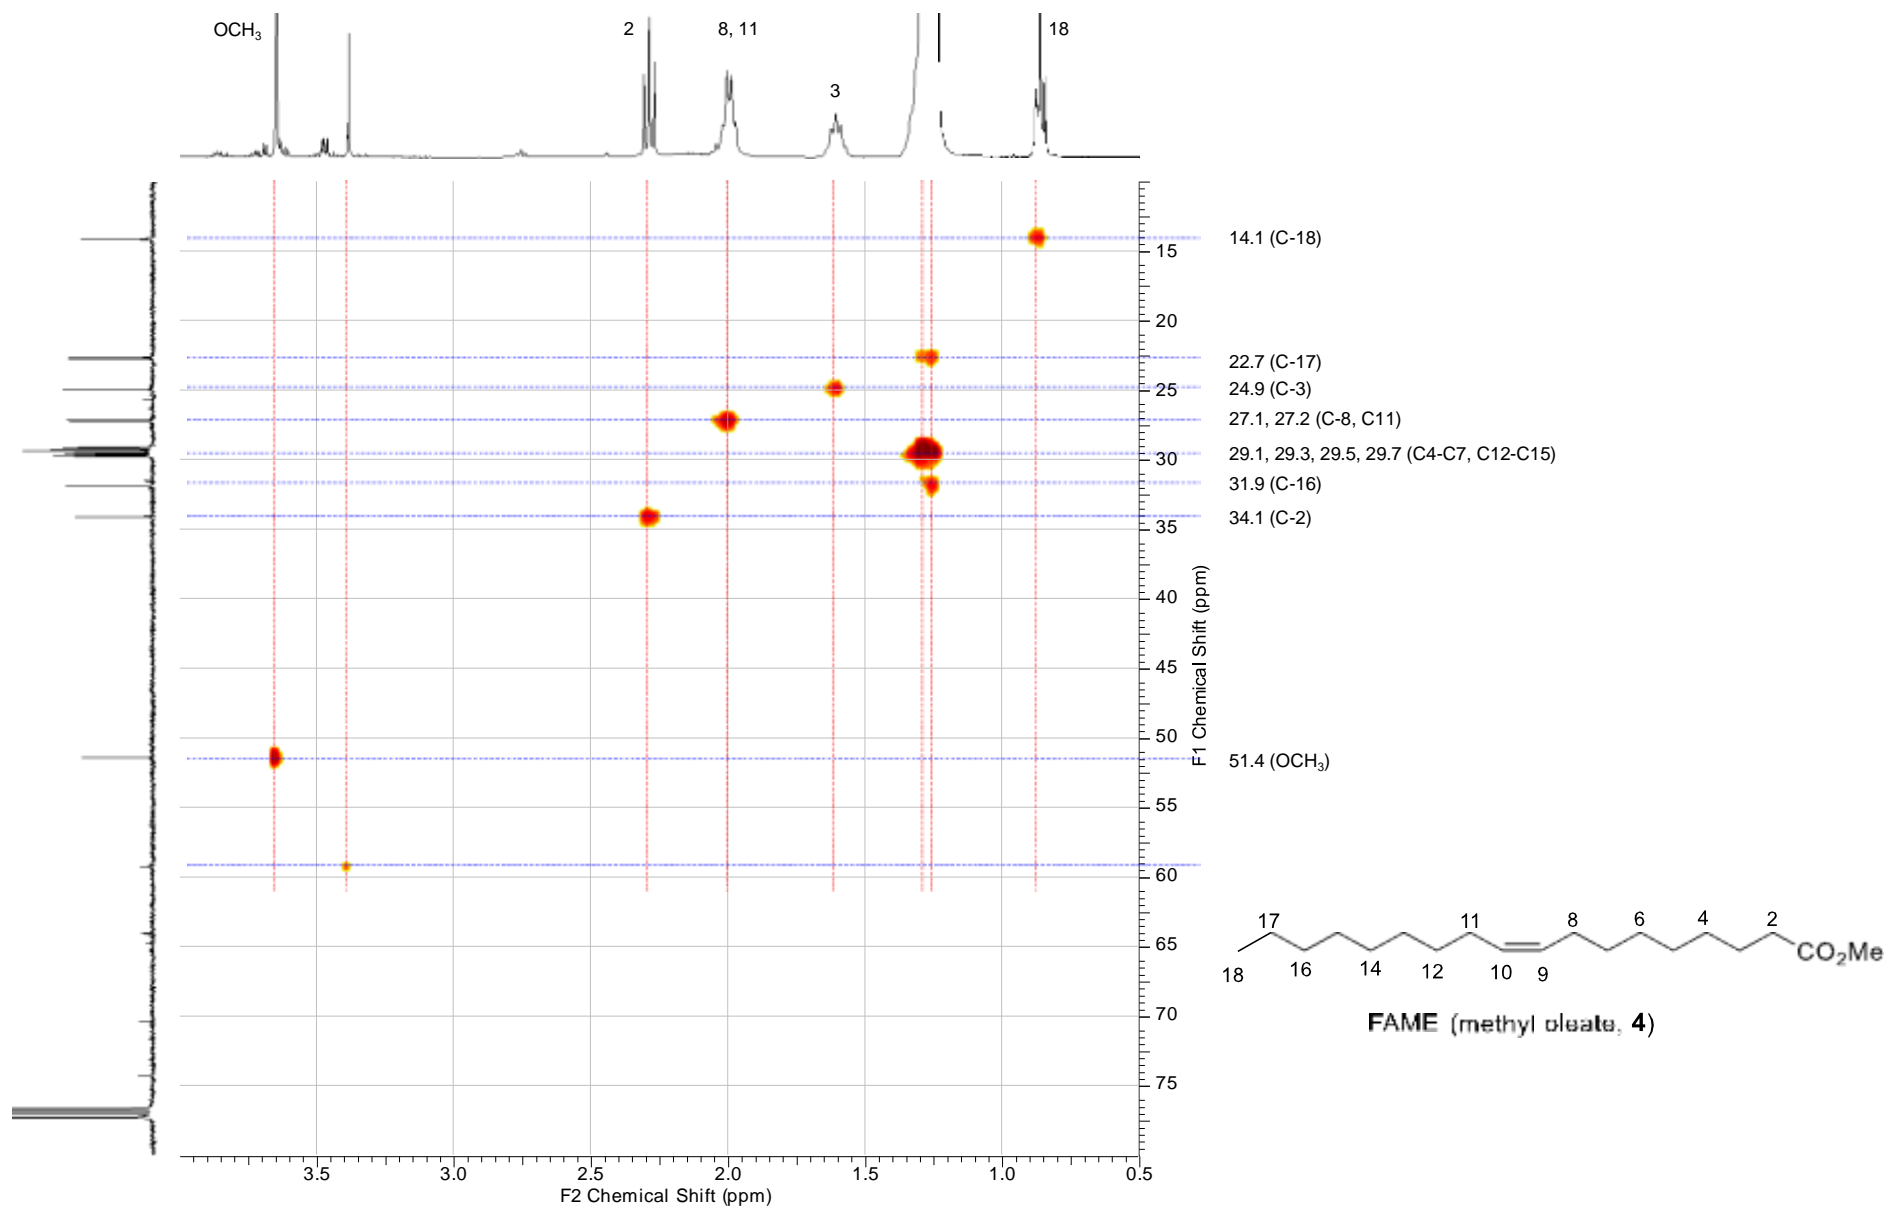

HSQC spectrum of FAME (**4**) in CDCl<sub>3</sub> (0.5 – 4.0, 10 – 80 ppm)

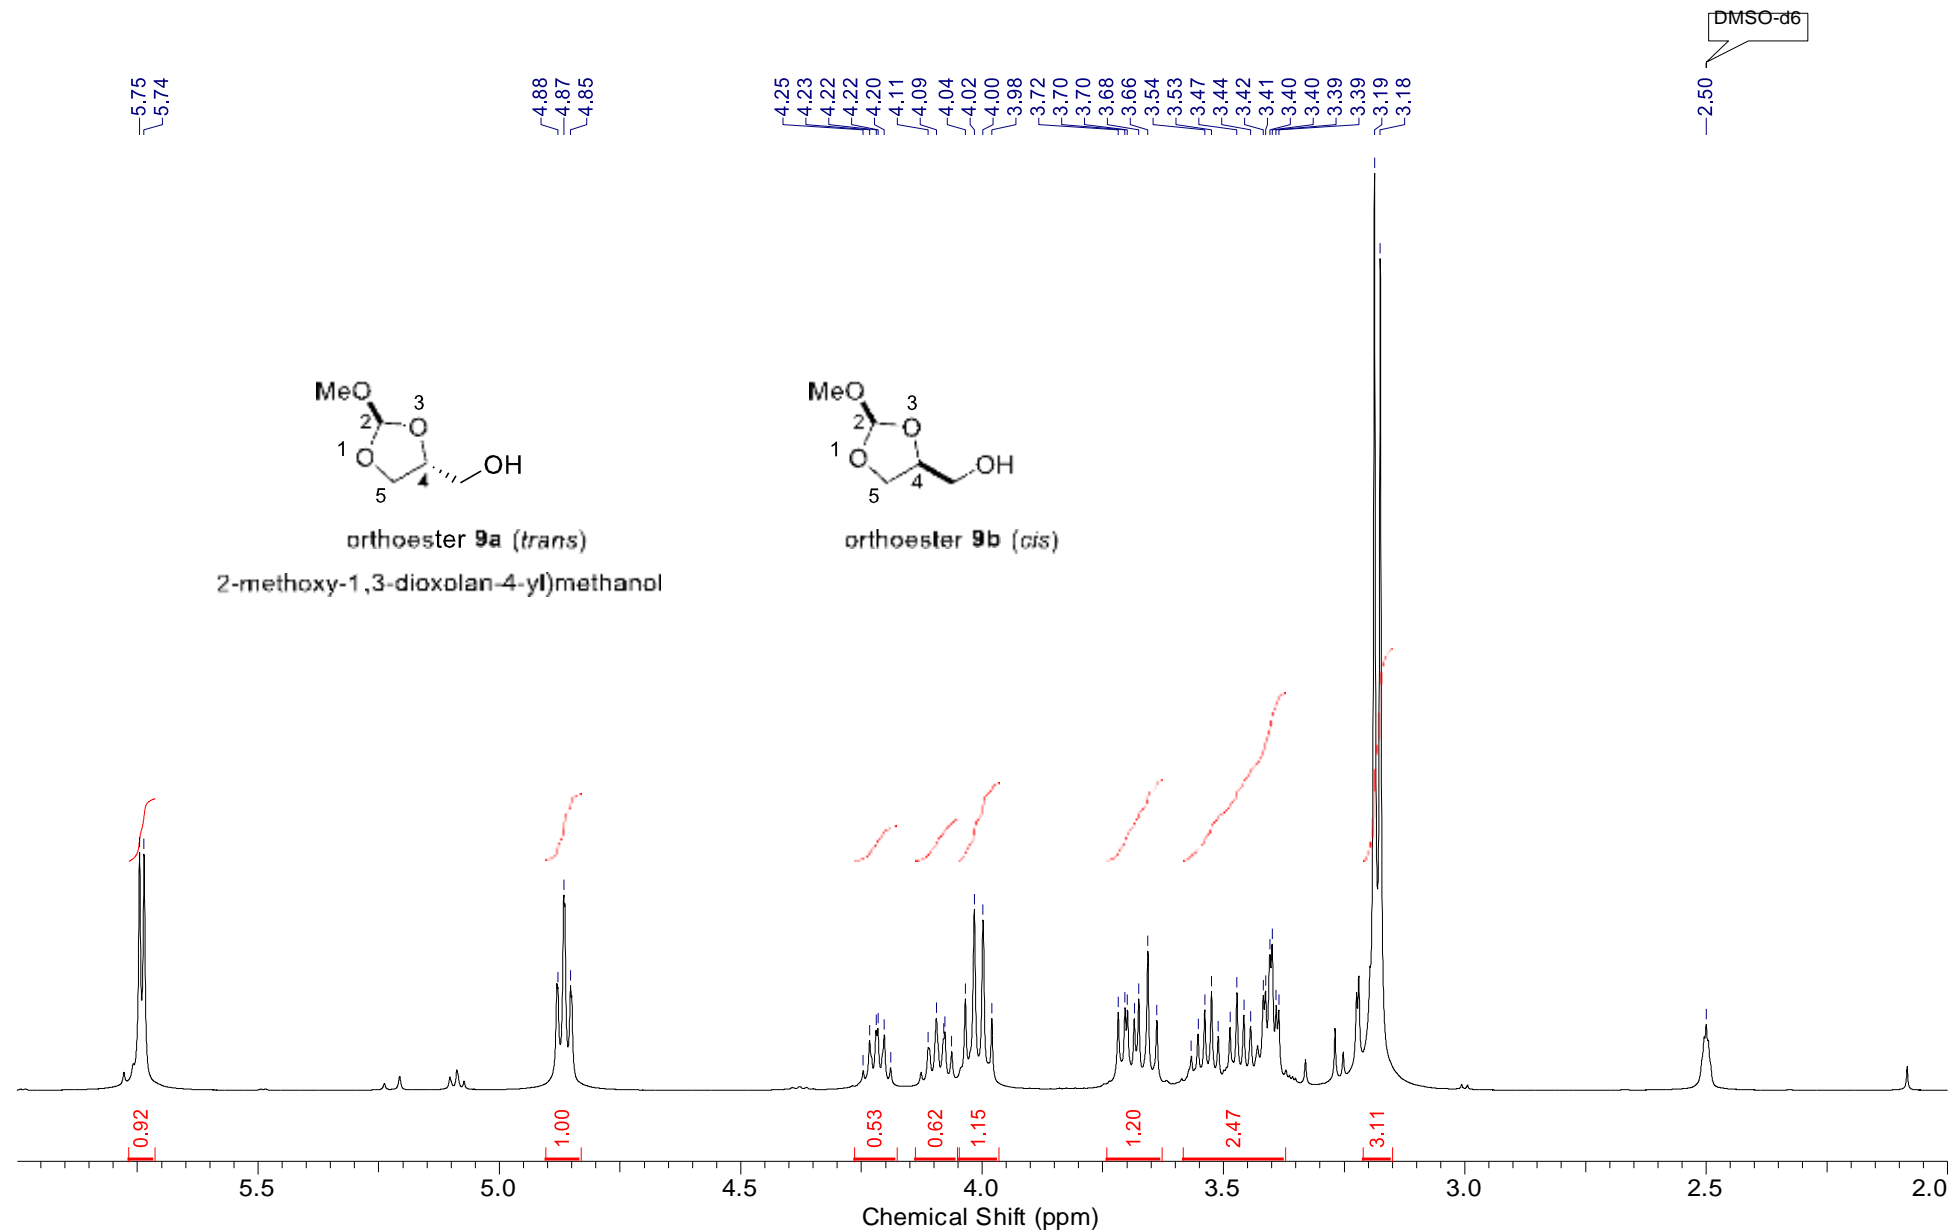

<sup>1</sup>H NMR (400 MHz) spectrum of orthoesters **9a** (*trans*) and **9b** (*cis*) in DMSO-d<sub>6</sub> (2.0 – 6.0 ppm)

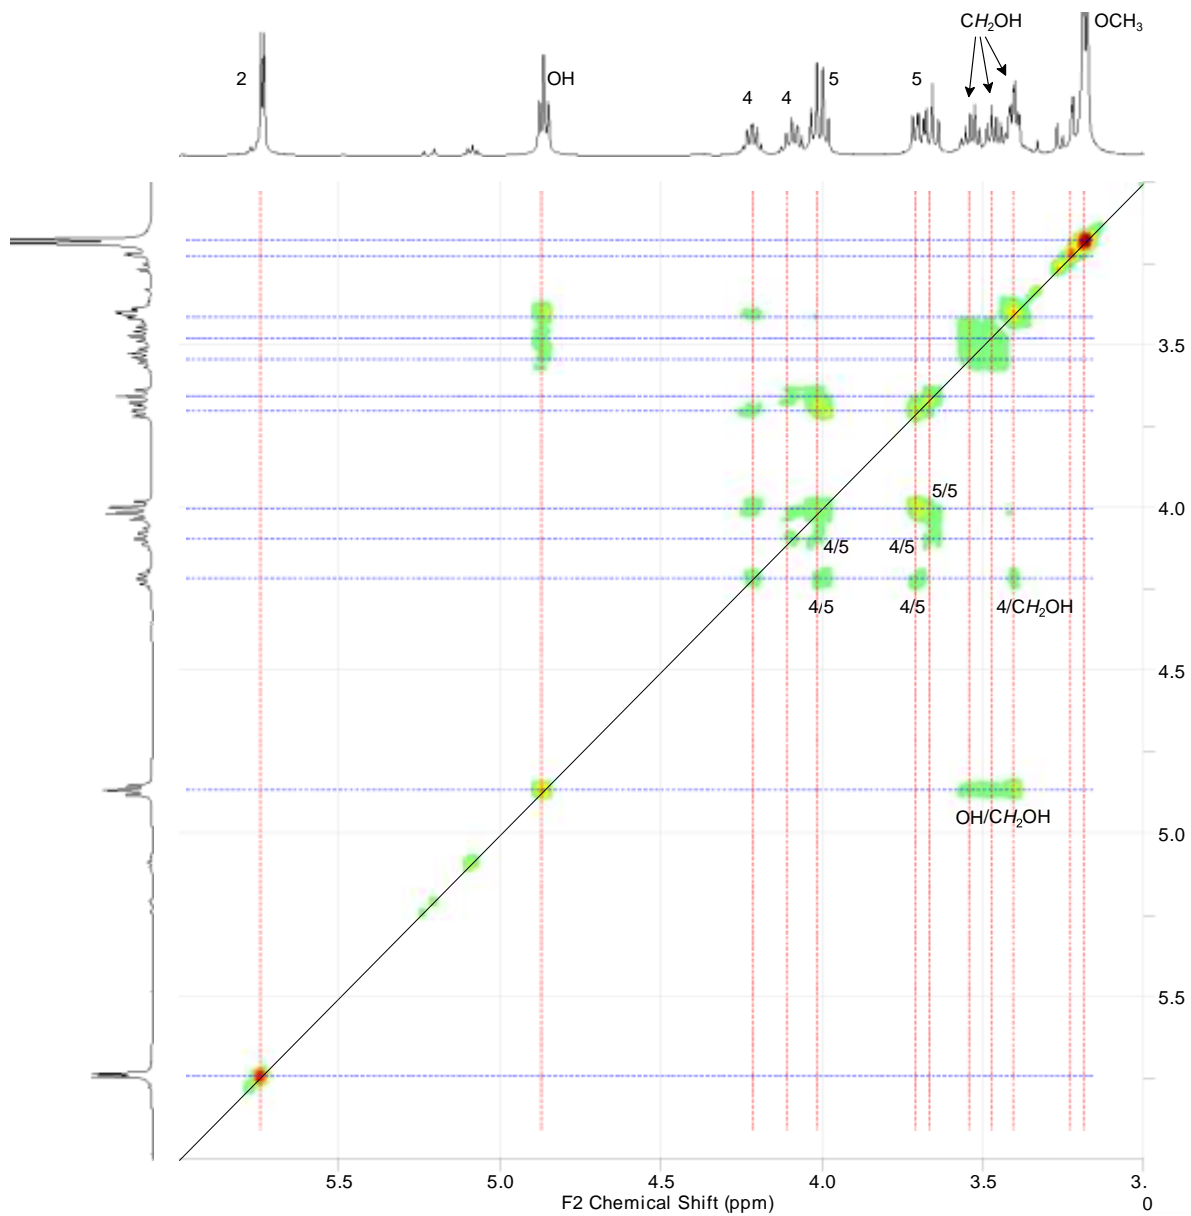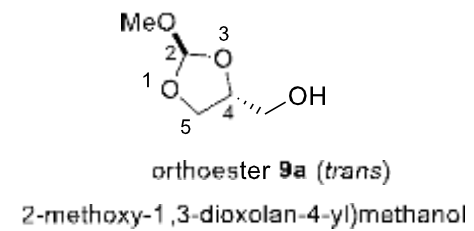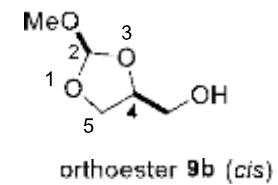

H-H COSY (400 MHz) spectrum of orthoesters **9a** (*trans*) and **9b** (*cis*) in DMSO-d<sub>6</sub> (3.0 – 6.0 ppm)



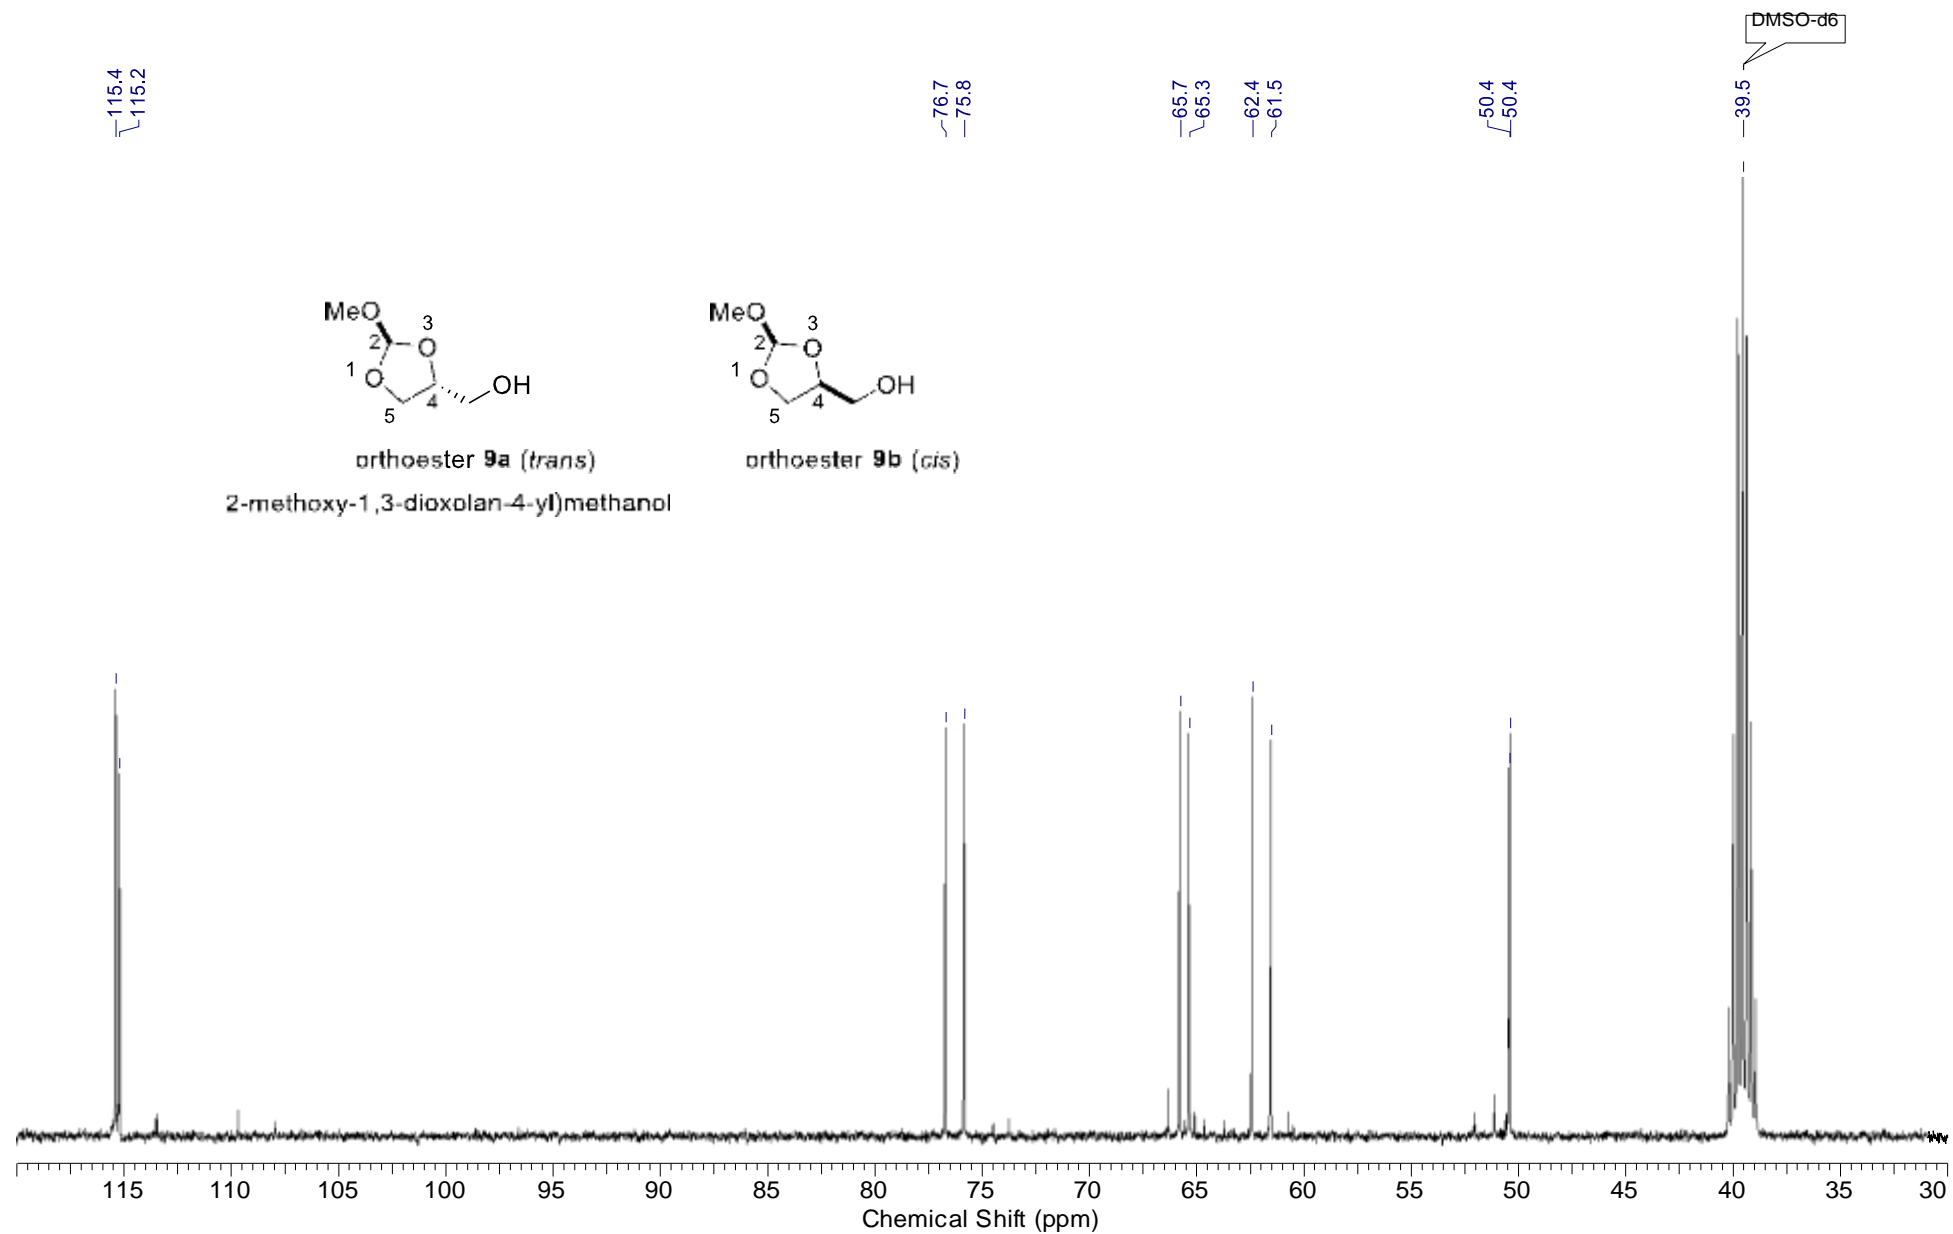

$^{13}\text{C}$  NMR (100 MHz) spectrum of orthoesters **9a** (*trans*) and **9b** (*cis*) in DMSO-d<sub>6</sub> (30 – 120 ppm)

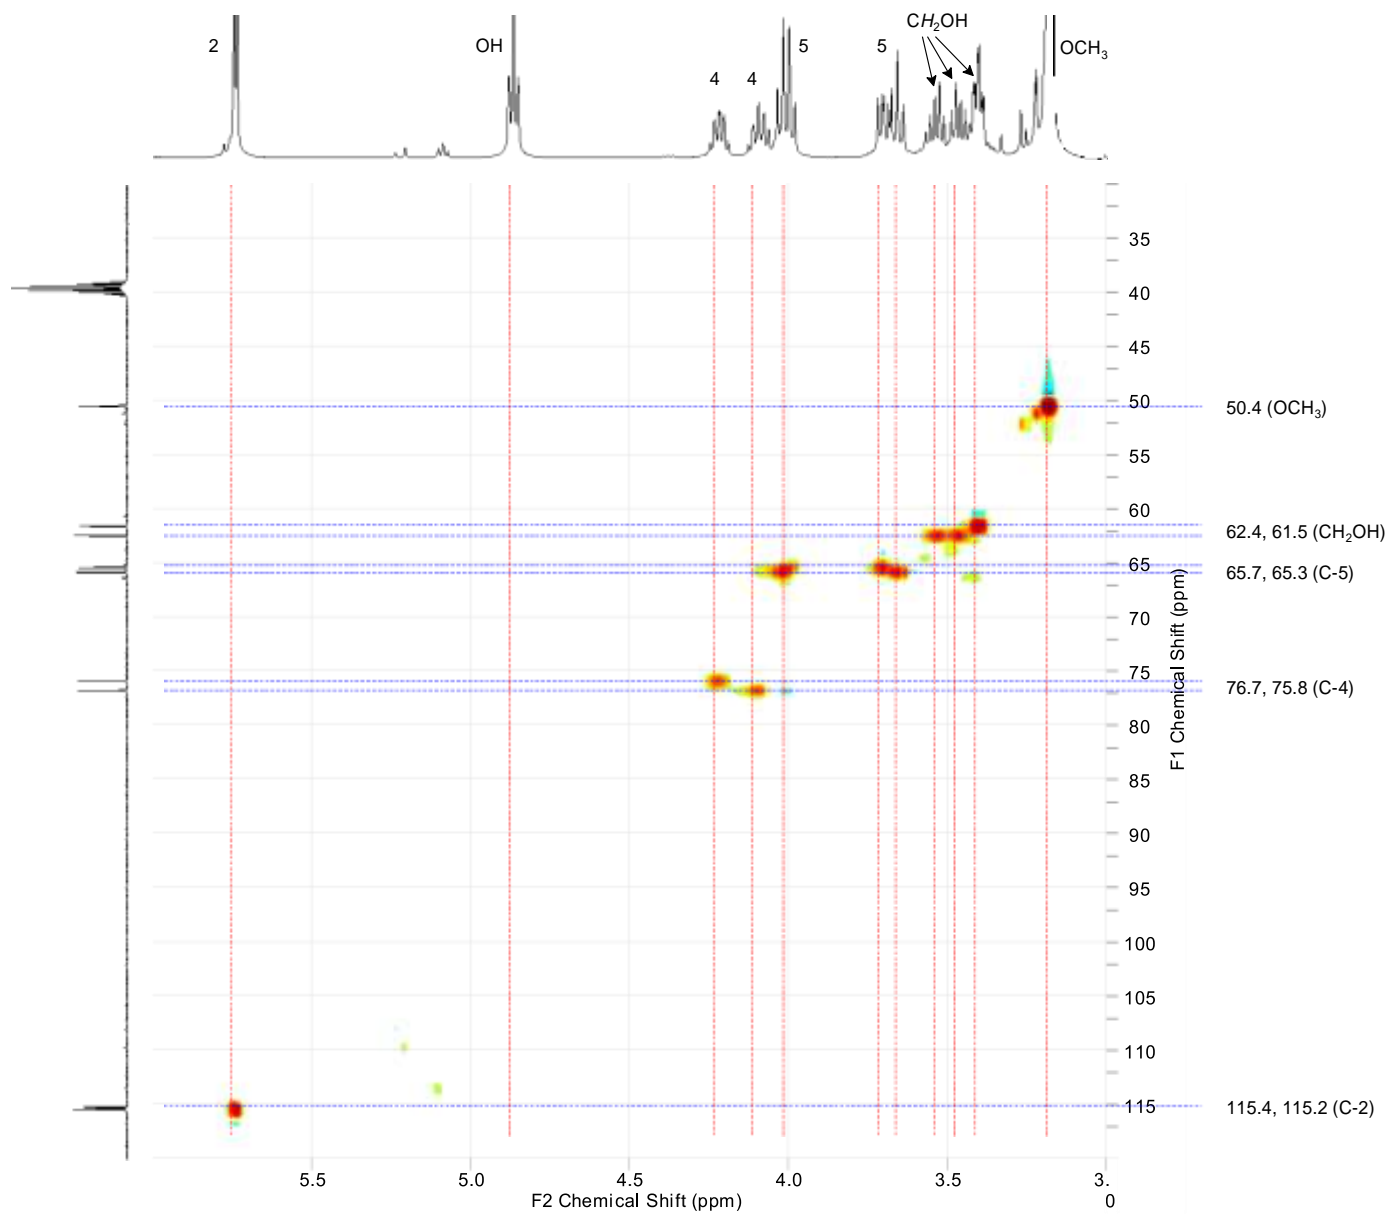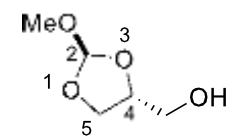

orthoester **9a** (*trans*)

2-methoxy-1,3-dioxolan-4-yl)methanol

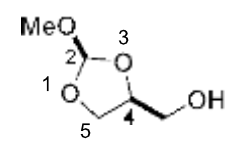

orthoester **9b** (*cis*)

HSQC spectrum of orthoesters **9a** (*trans*) and **9b** (*cis*) in DMSO- $d_6$  (3.0 – 6.0, 30 – 120 ppm)  
S10

# Display Report

## Analysis Info

Analysis Name D:\Data\oi\Wormann\_71-20\_GB2\_01\_31193.d  
Method fia\_ms\_80-1000\_pos\_neu.m  
Sample Name Wormann\_71-20  
Comment

Acquisition Date 4/26/2019 11:45:29 AM  
Operator BDAL@DE  
Instrument maXis 288882.21253

## Acquisition Parameter

|             |            |                      |          |                  |           |
|-------------|------------|----------------------|----------|------------------|-----------|
| Source Type | ESI        | Ion Polarity         | Positive | Set Nebulizer    | 1.2 Bar   |
| Focus       | Not active | Set Capillary        | 4500 V   | Set Dry Heater   | 200 °C    |
| Scan Begin  | 80 m/z     | Set End Plate Offset | -500 V   | Set Dry Gas      | 6.0 l/min |
| Scan End    | 1000 m/z   | Set Charging Voltage | 0 V      | Set Divert Valve | Waste     |
|             |            | Set Corona           | 0 nA     | Set APCI Heater  | 0 °C      |

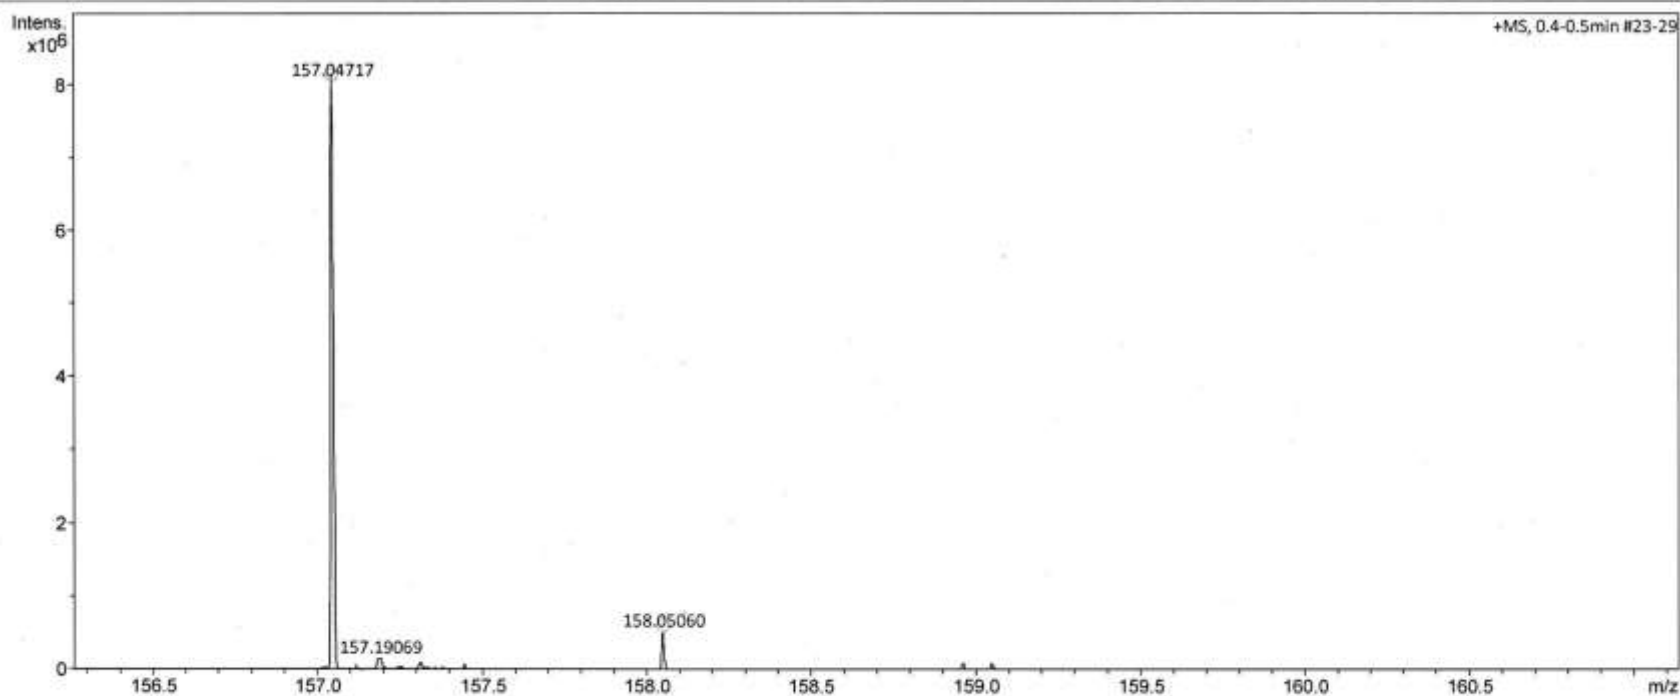

Wormann\_71-20\_GB2\_01\_31193.d  
Bruker Compass DataAnalysis 4.2

printed: 4/26/2019 12:24:04 PM

by: BDAL@DE

Page 1 of 1

HRMS (ESI-TOF) of cyclic orthoester **9** (mixture of **9a** and **9b**).

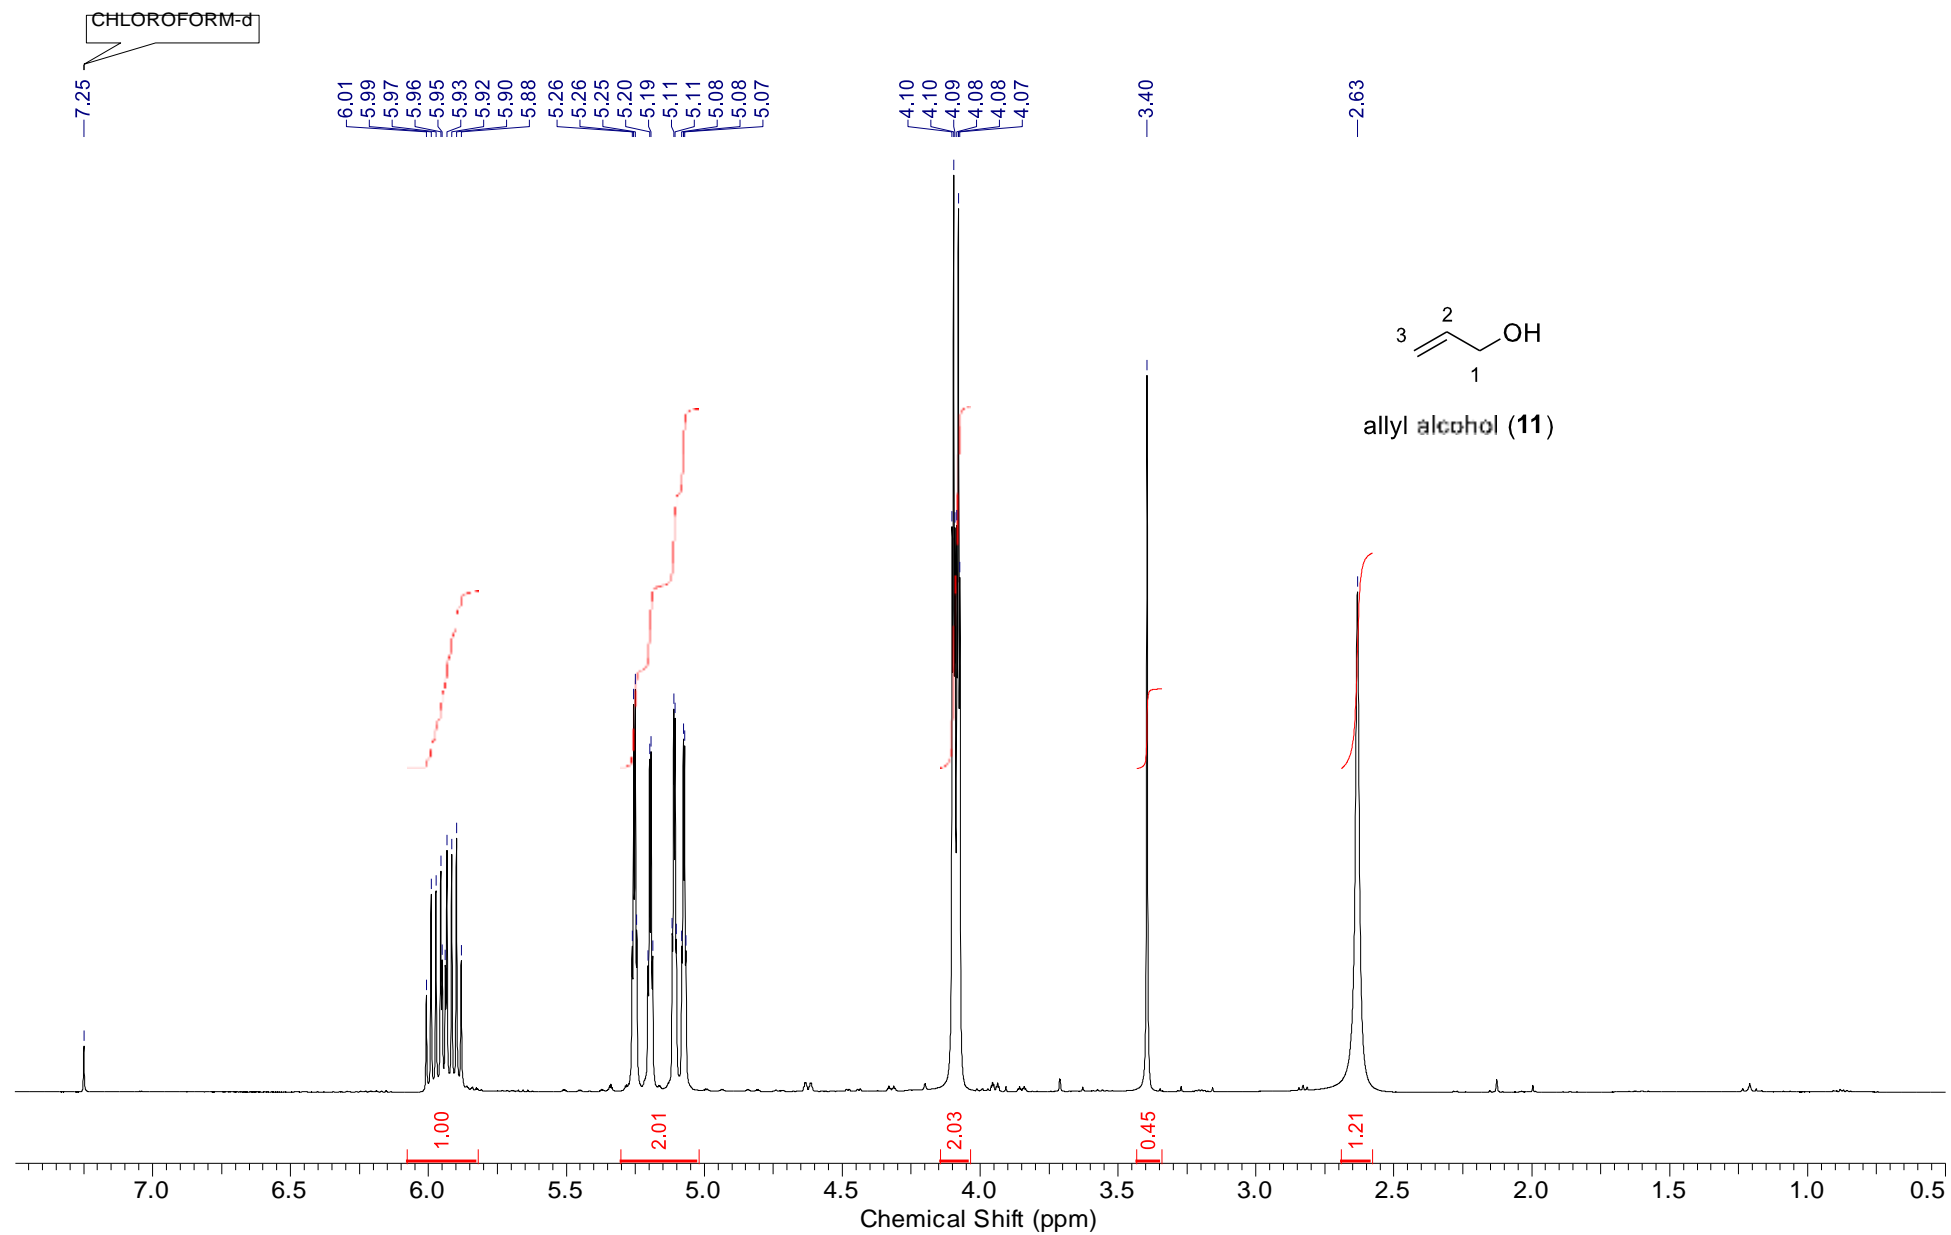

$^1\text{H}$  NMR (400 MHz) spectrum of allyl alcohol (**11**) in  $\text{CDCl}_3$  (0.5 – 7.5 ppm)

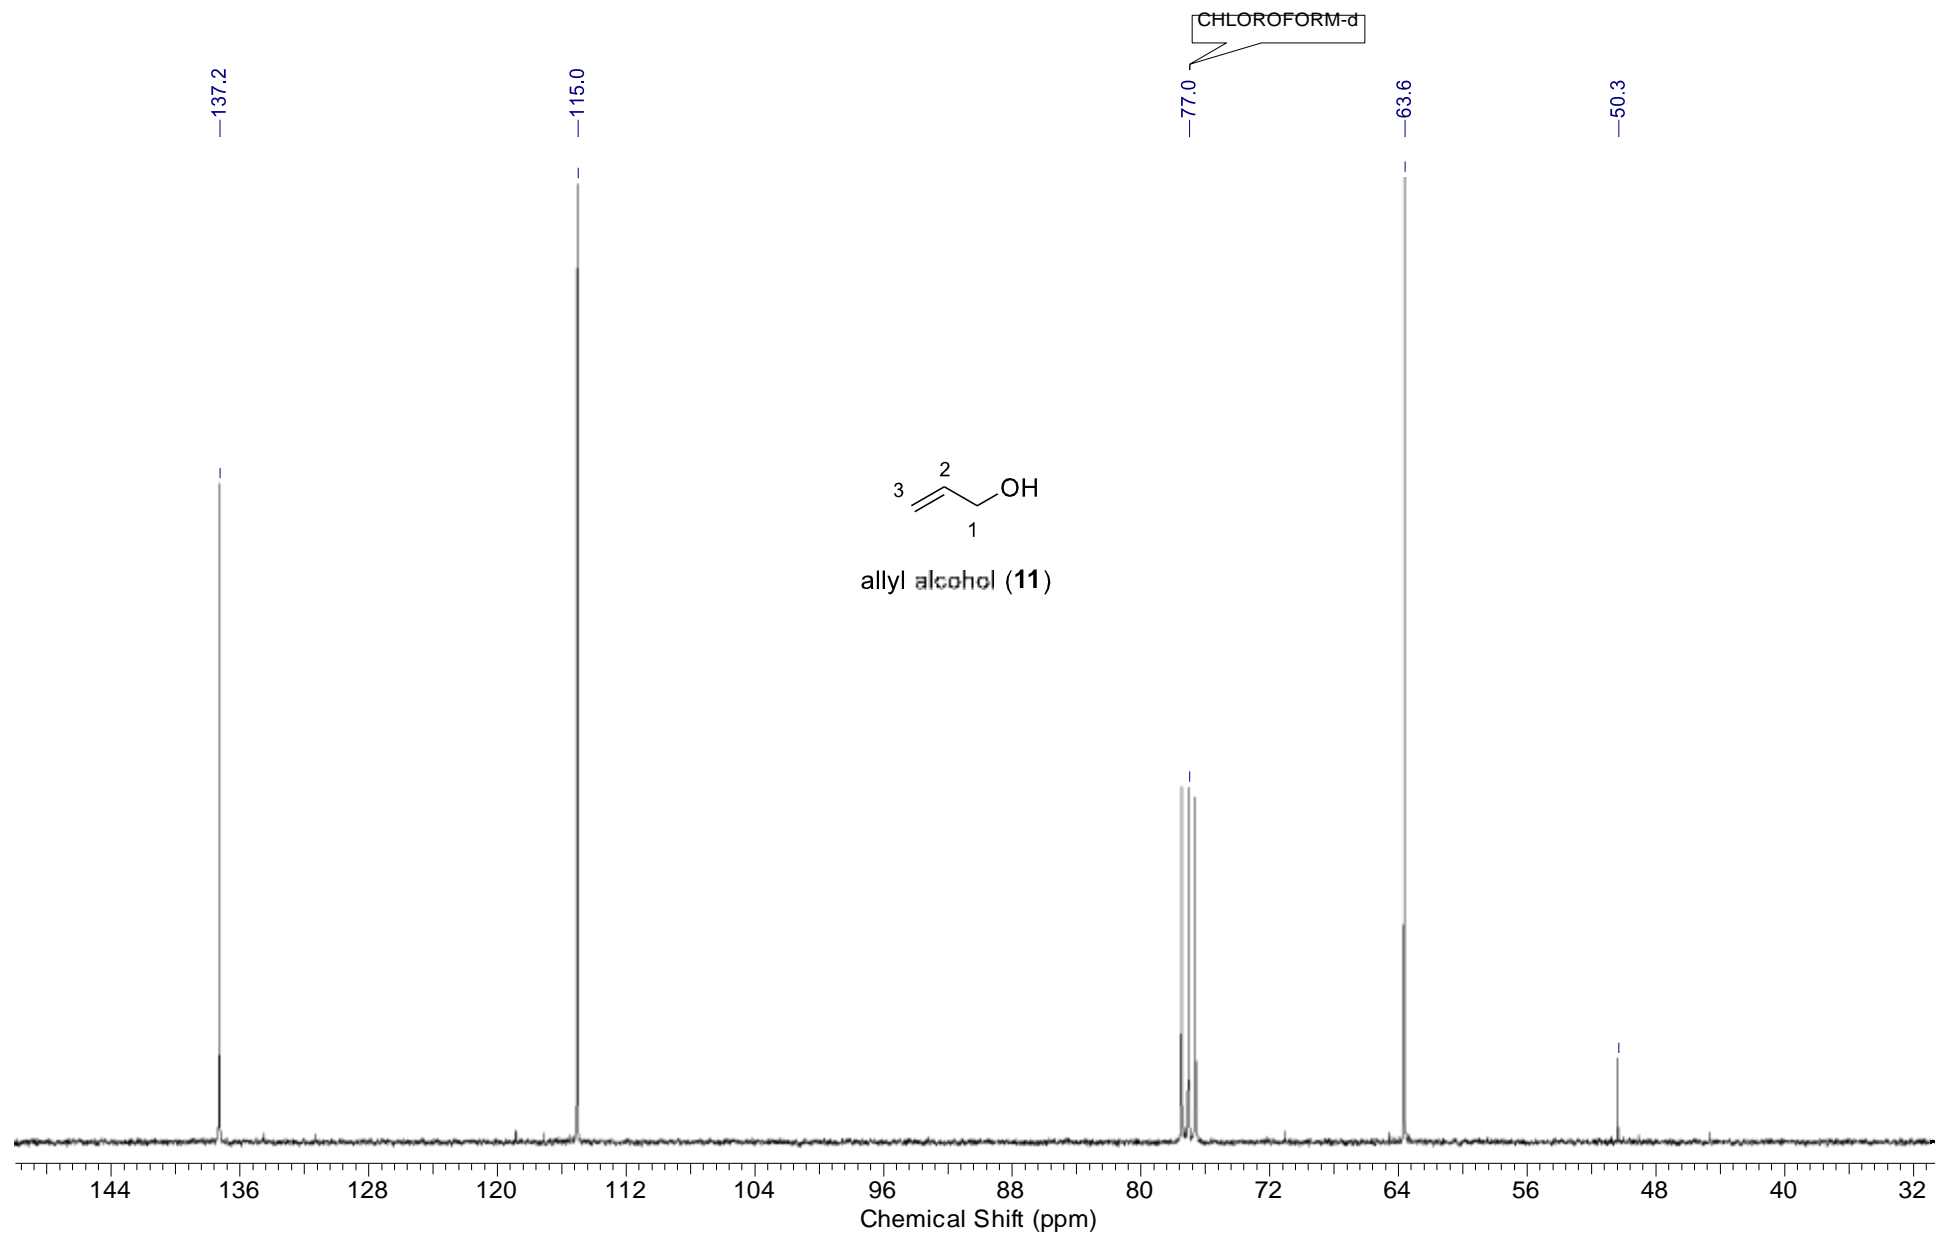

$^{13}\text{C}$  NMR (100 MHz) spectrum of allyl alcohol (**11**) in  $\text{CDCl}_3$  (30 – 150 ppm)

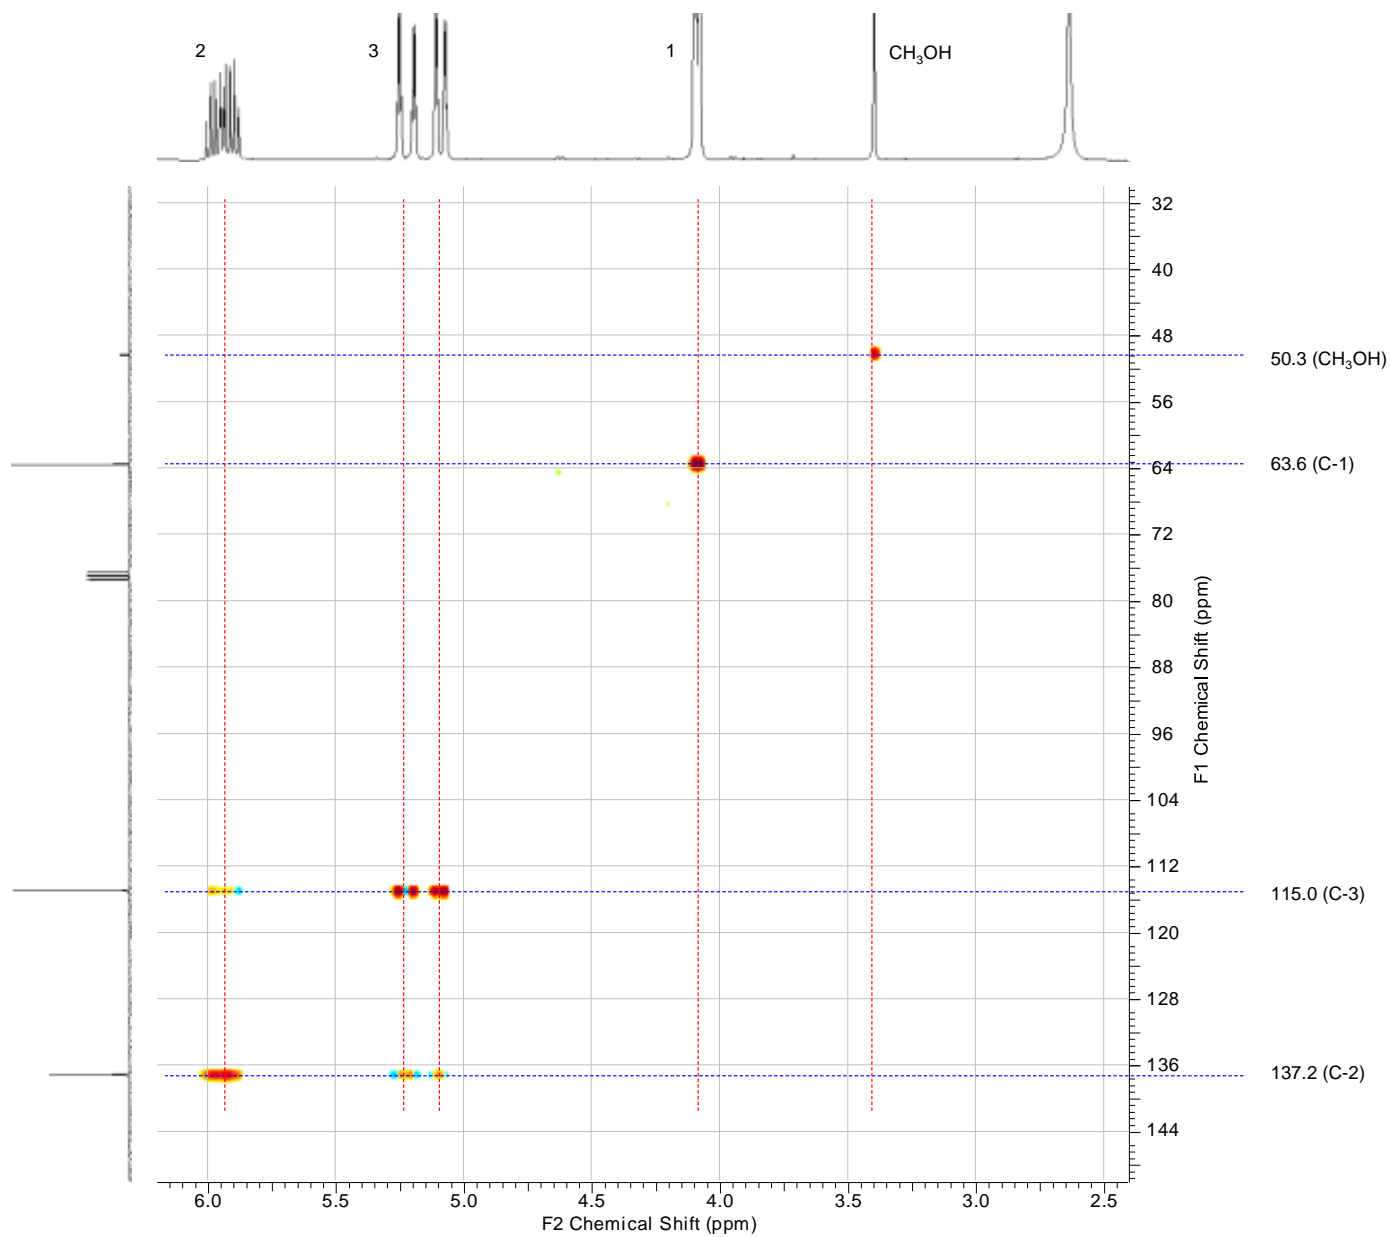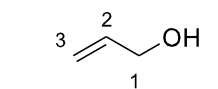

allyl alcohol (**11**)

HSQC spectrum of allyl alcohol (**11**) in CDCl<sub>3</sub> (2.4 – 6.2; 30 – 150 ppm)
